# Supplementary material for: In Vivo, In Vitro and In Silico Anticancer Activity of Ilama Leaves: An Edible and Medicinal Plant in Mexico
Source: MDPI journal article supplement (doi:10.3390/molecules29091956), 2024-04-24
Supplement: s1 [file s1]

# In vivo, in vitro and in silico Anticancer Activity of Ilama Leaves. An Edible and Medicinal Plant in Mexico.

Jesica Ramírez-Santos <sup>1,2</sup>, Fernando Calzada <sup>2,\*</sup>, Rosa María Ordoñez-Razo <sup>3</sup>, Jessica Elena Mendieta-Wejebe <sup>1</sup>, José Antonio Velázquez-Domínguez<sup>4</sup>, Raúl Argüello-García<sup>5</sup>, Claudia Velázquez<sup>6</sup>, and Elizabeth Barbosa<sup>1</sup>

## Supplementary material

**Figure S1.** Molecular Docking of the terpenoids bound to Bcl-2, (A) geranylgeraniol, (B) phytol, (C) farnesyl acetate and (D) navitoclax.

**Figure S2.** Molecular Docking of the terpenoids bound to Mcl-1, (A) geranylgeraniol, (B) phytol, (C) farnesyl acetate and (D) 9EA

**Figure S3.** Molecular Docking of the terpenoids bound to VEGFR-2, (A) geranylgeraniol, (B) farnesyl acetate, (C) phytol and (D) axitinib.

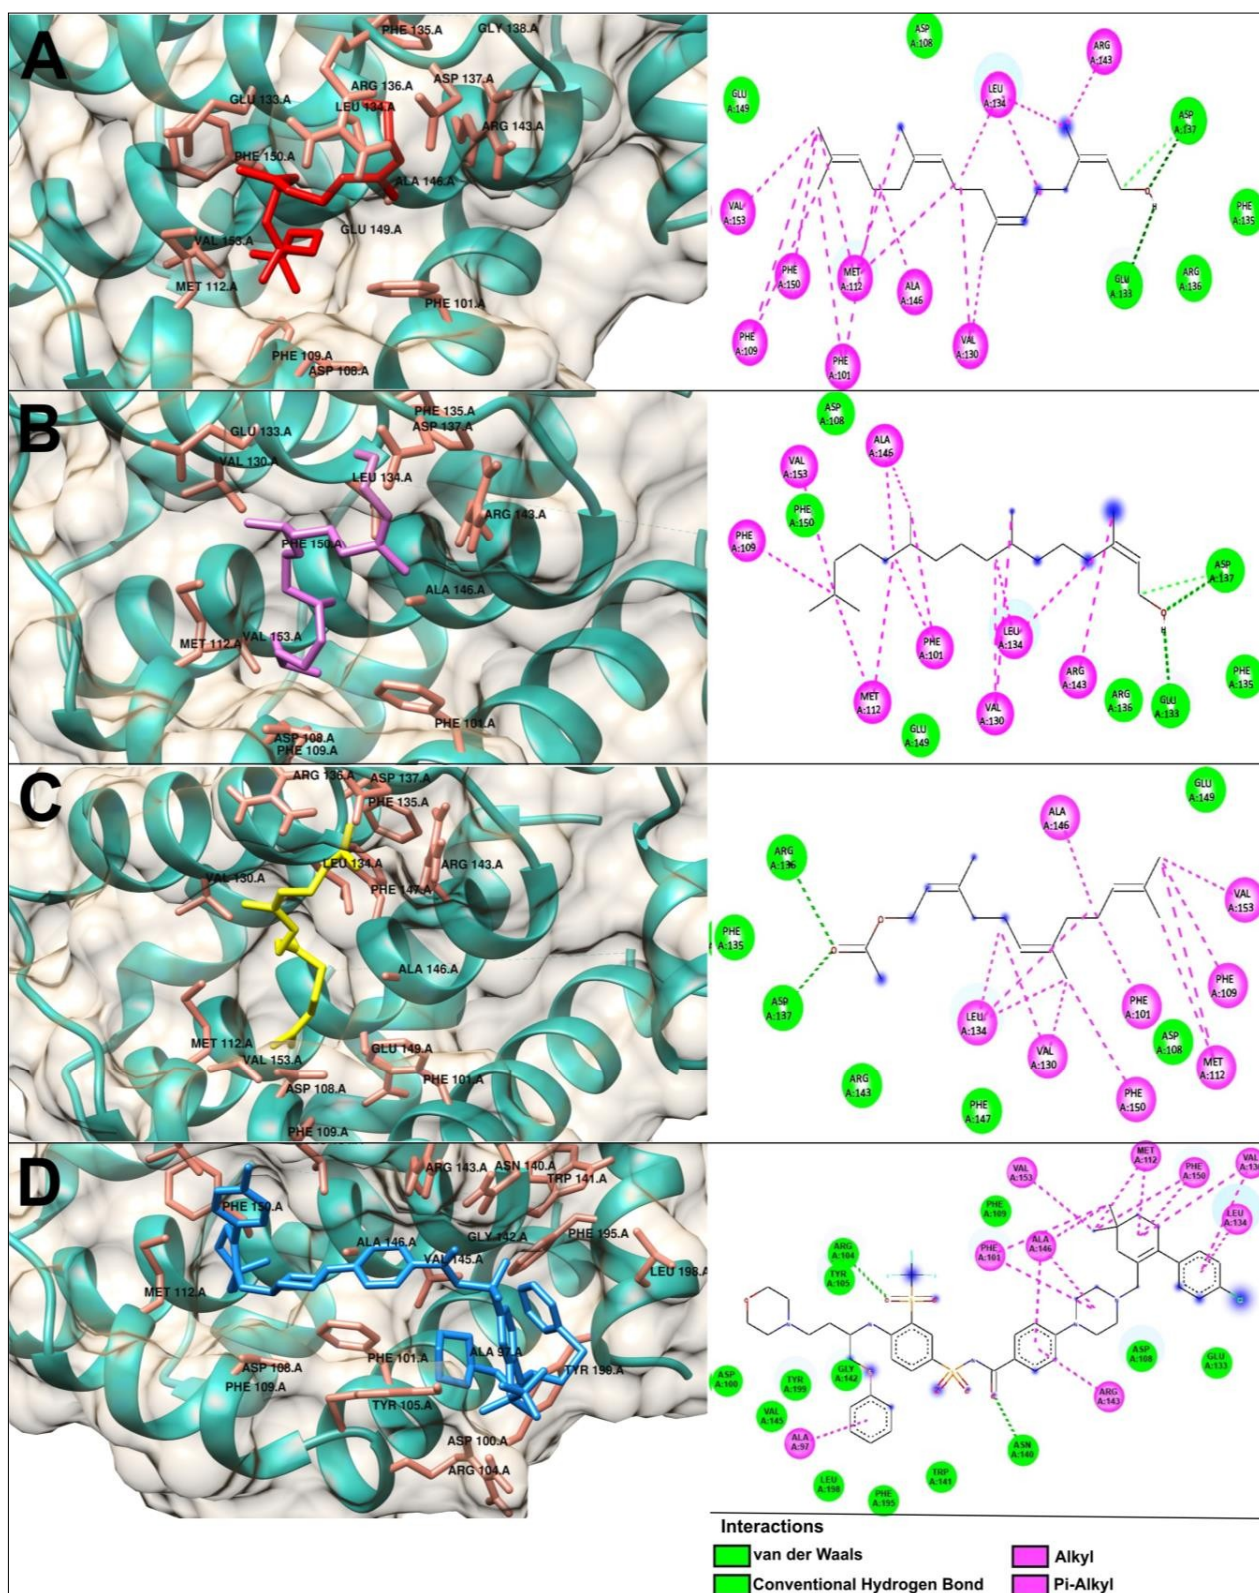

**Figure S1.** Molecular Docking of the terpenoids bound to Bcl-2, (A) geranylgeraniol, (B) phytol, (C) farnesyl acetate and (D) navitoclax

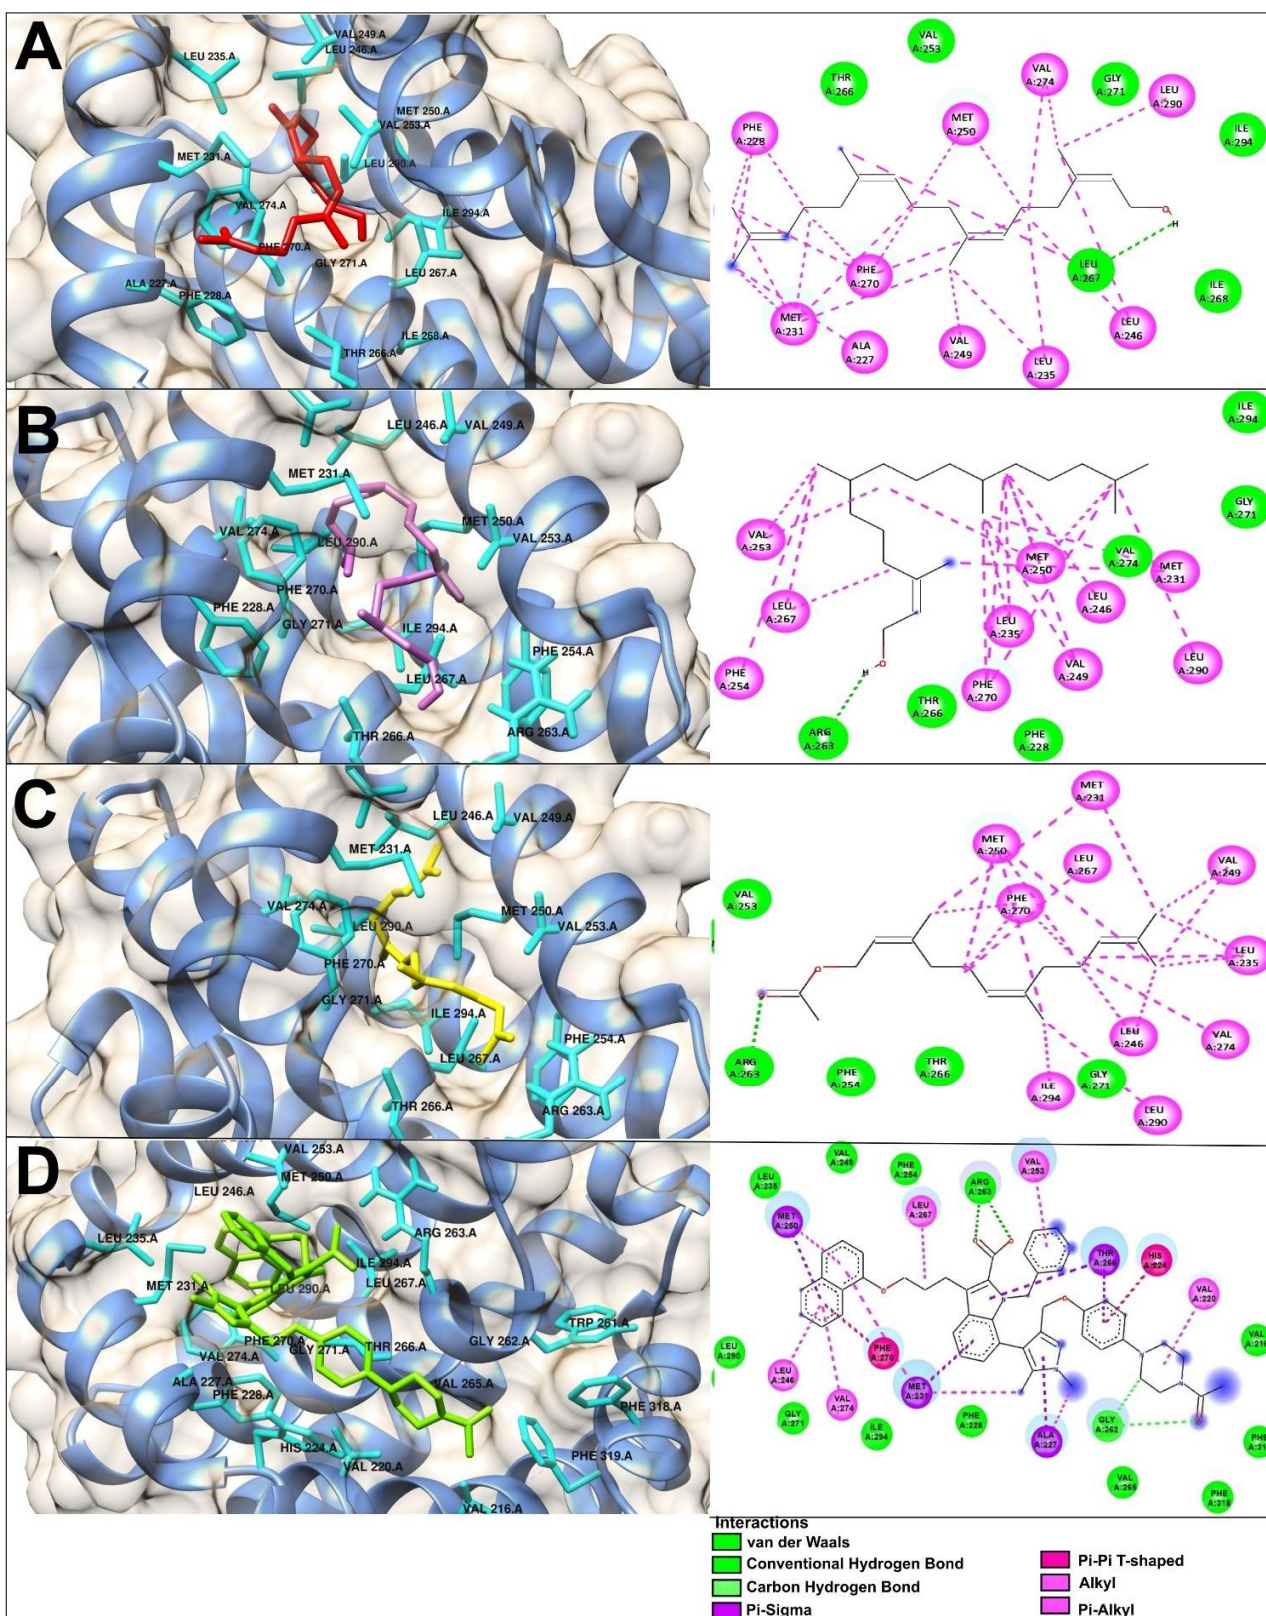

**Figure S2.** Molecular Docking of the terpenoids bound to Mcl-1, (A) geranylgeraniol, (B) phytol, (C) farnesyl acetate and (D) 9EA.

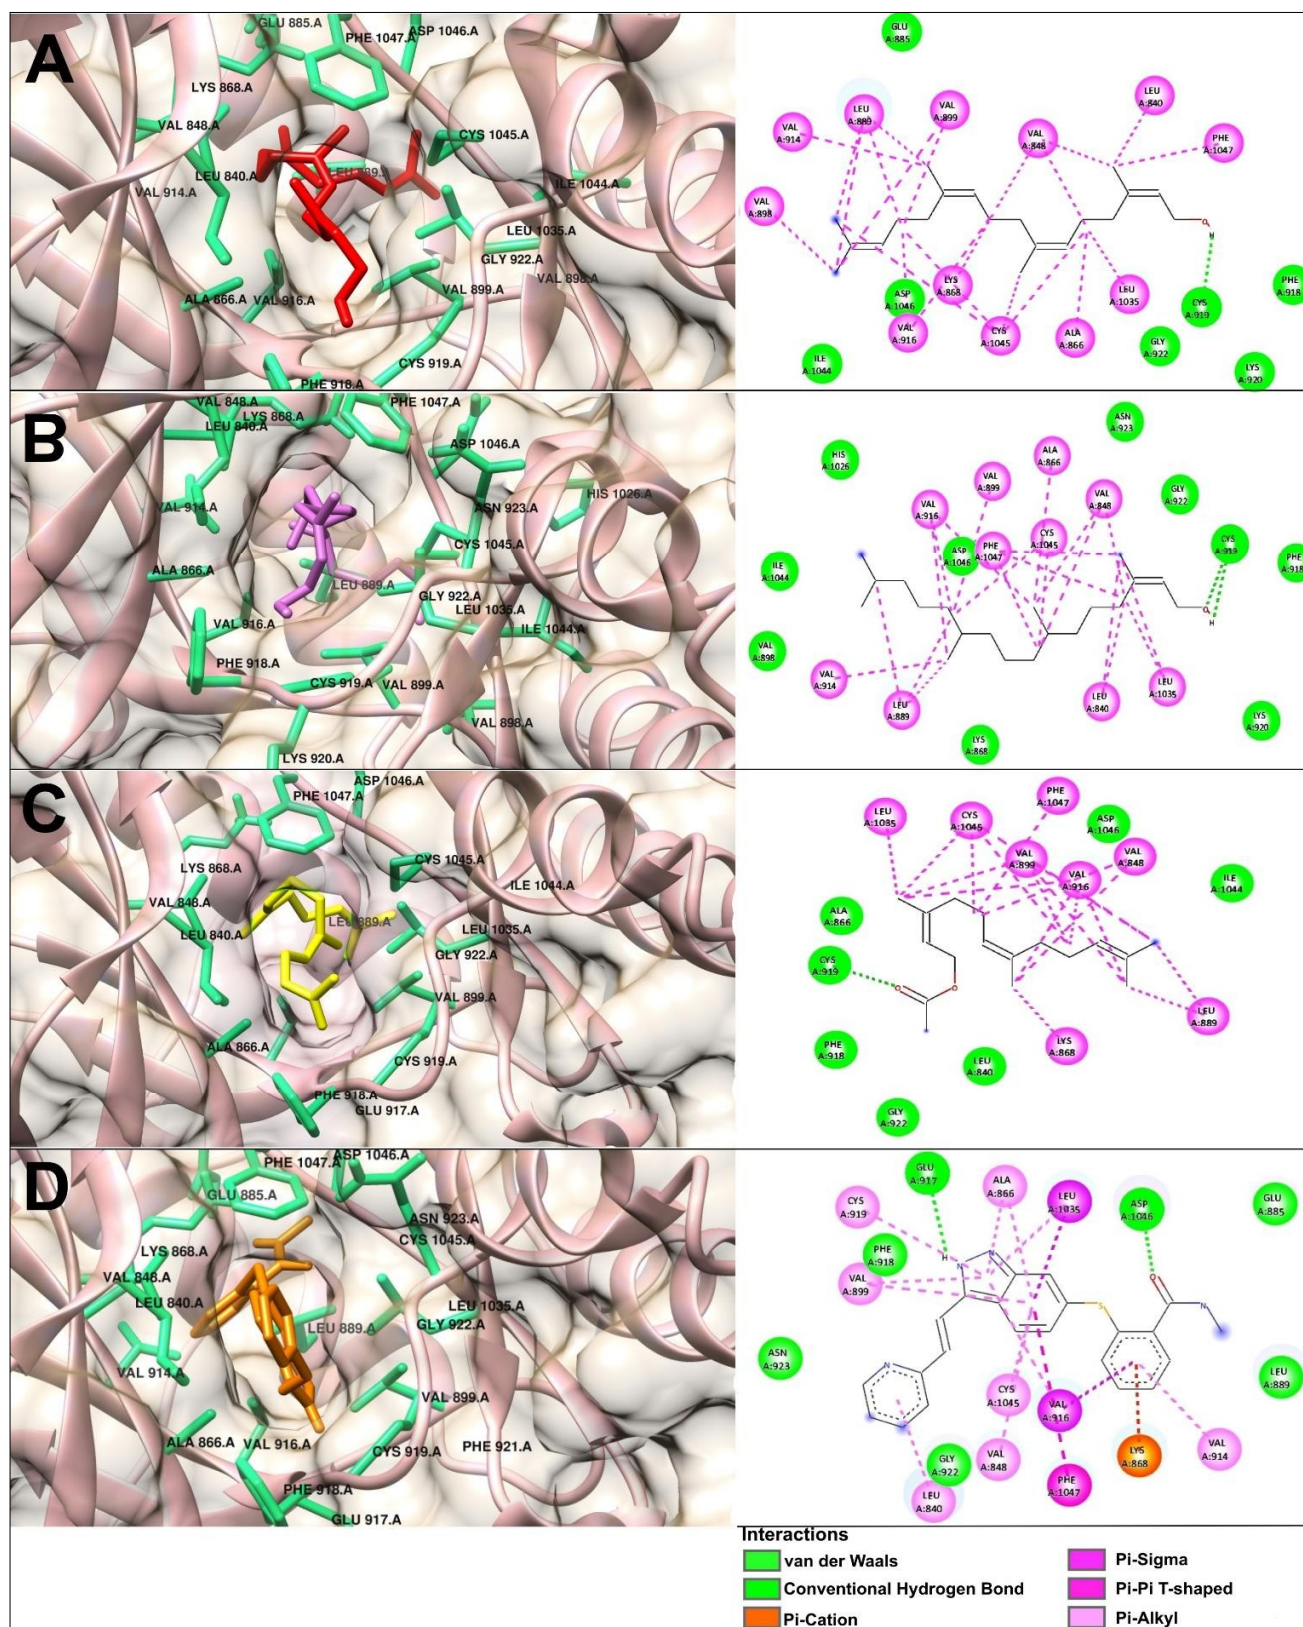

**Figure S3.** Molecular Docking of the terpenoids bound to VEGFR-2, (A) geranylgeraniol, (B) farnesyl acetate, (C) phytol and (D) axitinib.
